# Supplementary material
Source: Springer Nature journal article supplement (https://www.springermedizin.de/resource/supplementary/12967_2009_439_MOESM2_ESM.pdf/9576530)

**A****miR-17-5p**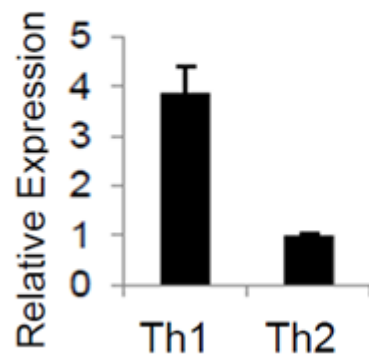**miR-18a**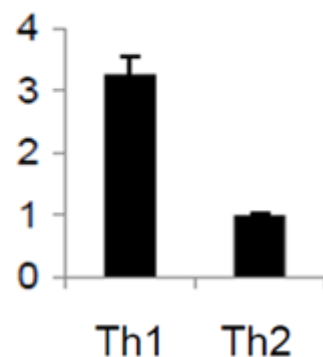**miR-19a**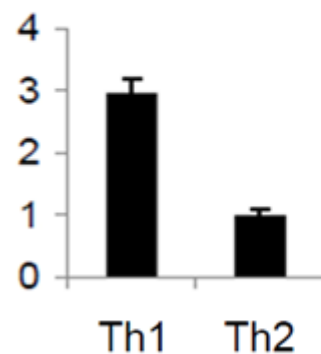**miR-20a**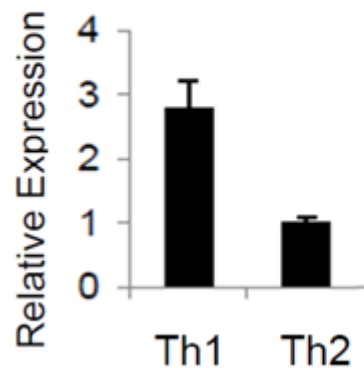**miR-19b**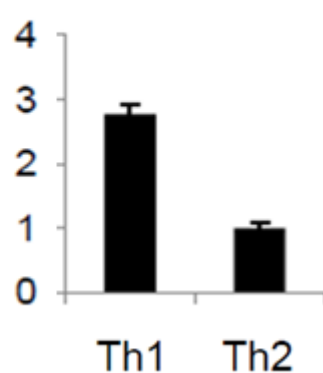**miR-92**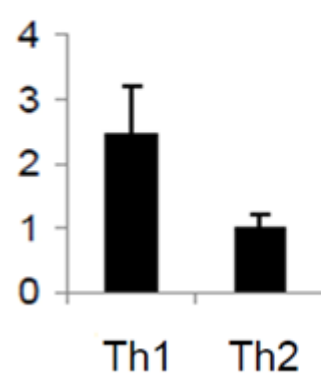**B****miR-106a**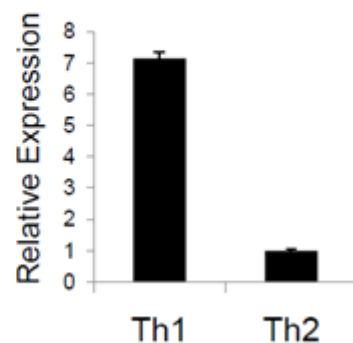**miR-106b**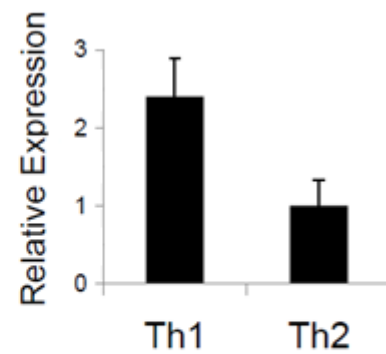

Supplement: MOESM2 [file 9576530]
